# Supplementary material for: Prevalence and Antimicrobial Susceptibility of Bovine Mycoplasma Species in Egypt
Source: MDPI journal article supplement (doi:10.3390/biology11071083), 2022-07-20
Supplement: s1 [file s1]

## Article

# Prevalence and Antimicrobial Susceptibility of Bovine *Mycoplasma* Species in Egypt

Ahmed M. Ammar <sup>1,†</sup>, Marwa I. Abd El-Hamid <sup>1,†</sup>, Yousreya H. Mohamed <sup>2</sup>, Heba M. Mohamed <sup>1</sup>, Dalal H. M. Al-khalifah <sup>3</sup>, Wael N. Hozzein <sup>4</sup>, Samy Selim <sup>5</sup>, Wafaa M. El-Neshwy <sup>6</sup> and Rania M. S. El-Malt <sup>7,\*</sup>

<sup>1</sup> Department of Microbiology, Faculty of Veterinary Medicine, Zagazig University, Zagazig 44519, Egypt; aaahmmad@vet.zu.edu.eg (A.M.A.); mero\_micro@zu.edu.eg (M.I.A.E.-H.); h.moatz22@vet.zu.edu.eg (H.M.M.)

<sup>2</sup> Department of Mycoplasma Research, Animal Health Research Institute, Agriculture Research Center, Giza 12622, Egypt; yousreya@ahri.gov.eg

<sup>3</sup> Department of Biology, College of Science, Princess Nourah Bint Abdulrahman University, P.O. Box 84428, Riyadh 11671, Saudi Arabia; dhalkalifah@pnu.edu.sa

<sup>4</sup> Botany and Microbiology Department, Faculty of Science, Beni-Suef University, Beni-Suef 62511, Egypt; hozzein29@yahoo.com

<sup>5</sup> Department of Clinical Laboratory Sciences, College of Applied Medical Sciences, Jouf University, Sakaka 72388, Saudi Arabia; sabdulsalam@ju.edu.sa

<sup>6</sup> Department of Animal Medicine, Infectious Diseases, Faculty of Veterinary Medicine, Zagazig University, Zagazig 44519, Egypt; wafaesmail@zu.edu.eg

<sup>7</sup> Department of Bacteriology, Zagazig Branch, Animal Health Research Institute, Agriculture Research Center, Zagazig 44516, Egypt

\* Correspondence: rm.saeed@vet.zu.edu.eg

† These authors contributed equally to this work.

**Citation:** Ammar, A.M.; Abd El-Hamid, M.I.; Mohamed, Y.H.; Mohamed, H.M.; Al-khalifah, D.H.M.; Hozzein, W.N.; Selim, S.; El-Neshwy, W.M.; El-Malt, R.M.S. Prevalence and Antimicrobial Susceptibility of Bovine *Mycoplasma* Species in Egypt. *Biology* **2022**, *11*, 1083. <https://doi.org/10.3390/biology11071083>

Academic Editor: Chrissoula Voidarou, Athina S. Tzora, Georgios Rozos and Huizhong Chen

Received: 26 May 2022

Accepted: 15 July 2022

Published: 20 July 2022

**Publisher's Note:** MDPI stays neutral with regard to jurisdictional claims in published maps and institutional affiliations.

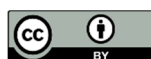

**Copyright:** © 2022 by the authors. Licensee MDPI, Basel, Switzerland. This article is an open access article distributed under the terms and conditions of the Creative Commons Attribution (CC BY) license (<https://creativecommons.org/licenses/by/4.0/>).

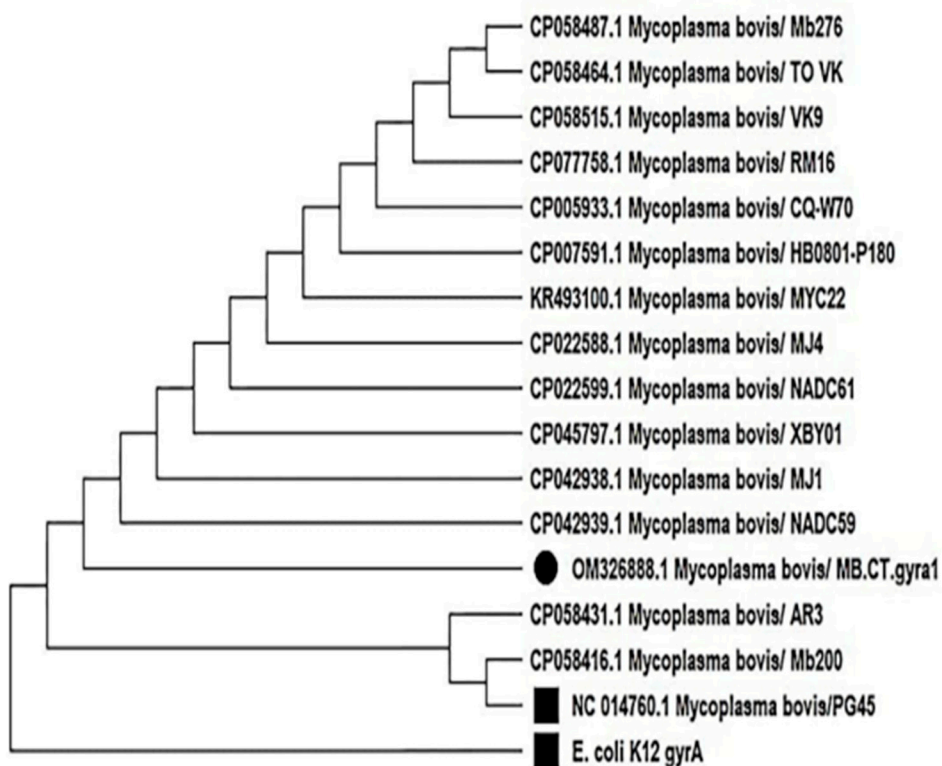

**Supplementary Figure S1.** Phylogenetic tree of the examined *M. bovis* isolate based on the *gyrA* sequence. ● Our examined *M. bovis* isolate, ■ Reference strains; *E. coli* K12 and *M. bovis* PG45 (control negative; enrofloxacin sensitive).

|                                 |  |                               |                                           |     |     |
|---------------------------------|--|-------------------------------|-------------------------------------------|-----|-----|
|                                 |  | 10                            | 20                                        | 30  | 40  |
| E. coli K12 gyrA                |  | ..... ..... ..... ..... ..... | KPKDSKSDDEDEDSFQNKPEYKVKQPKLVETEQGGIIFMQ  |     |     |
| OM326888.1 Mycoplasma bovis/ M  |  | ..... ..... ..... ..... ..... | .....                                     |     |     |
| CP042939.1 Mycoplasma bovis/ N  |  | ..... ..... ..... ..... ..... | .....                                     |     |     |
| CP042938.1 Mycoplasma bovis/ M  |  | ..... ..... ..... ..... ..... | .....                                     |     |     |
| CP045797.1 Mycoplasma bovis/ X  |  | ..... ..... ..... ..... ..... | .....                                     |     |     |
| CP022599.1 Mycoplasma bovis/ N  |  | ..... ..... ..... ..... ..... | .....                                     |     |     |
| CP022588.1 Mycoplasma bovis/ M  |  | ..... ..... ..... ..... ..... | .....                                     |     |     |
| KR493100.1 Mycoplasma bovis/ M  |  | ..... ..... ..... ..... ..... | .....                                     |     |     |
| CP007591.1 Mycoplasma bovis/ H  |  | ..... ..... ..... ..... ..... | .....                                     |     |     |
| CP005933.1 Mycoplasma bovis/ C  |  | ..... ..... ..... ..... ..... | .....                                     |     |     |
| CP077758.1 Mycoplasma bovis/ R  |  | ..... ..... ..... ..... ..... | .....                                     |     |     |
| CP058515.1 Mycoplasma bovis/ V  |  | ..... ..... ..... ..... ..... | .....                                     |     |     |
| CP058487.1 Mycoplasma bovis/ M  |  | ..... ..... ..... ..... ..... | .....                                     |     |     |
| CP058464.1 Mycoplasma bovis/ T  |  | ..... ..... ..... ..... ..... | .....                                     |     |     |
| CP058431.1 Mycoplasma bovis/ A  |  | ..... ..... ..... ..... ..... | .....                                     |     |     |
| CP058416.1 Mycoplasma bovis/ M  |  | ..... ..... ..... ..... ..... | .....                                     |     |     |
| NC_014760.1 Mycoplasma bovis/ P |  | ..... ..... ..... ..... ..... | .....                                     |     |     |
|                                 |  | 50                            | 60                                        | 70  | 80  |
| E. coli K12 gyrA                |  | ..... ..... ..... ..... ..... | ISKEMKVSFLDYAMSVIVSRALPDARDGLKPVHRIILYDM  |     |     |
| OM326888.1 Mycoplasma bovis/ M  |  | ..... ..... ..... ..... ..... | .....                                     |     |     |
| CP042939.1 Mycoplasma bovis/ N  |  | ..... ..... ..... ..... ..... | .....                                     |     |     |
| CP042938.1 Mycoplasma bovis/ M  |  | ..... ..... ..... ..... ..... | .....                                     |     |     |
| CP045797.1 Mycoplasma bovis/ X  |  | ..... ..... ..... ..... ..... | .....                                     |     |     |
| CP022599.1 Mycoplasma bovis/ N  |  | ..... ..... ..... ..... ..... | .....                                     |     |     |
| CP022588.1 Mycoplasma bovis/ M  |  | ..... ..... ..... ..... ..... | .....                                     |     |     |
| KR493100.1 Mycoplasma bovis/ M  |  | ..... ..... ..... ..... ..... | .....                                     |     |     |
| CP007591.1 Mycoplasma bovis/ H  |  | ..... ..... ..... ..... ..... | .....                                     |     |     |
| CP005933.1 Mycoplasma bovis/ C  |  | ..... ..... ..... ..... ..... | .....                                     |     |     |
| CP077758.1 Mycoplasma bovis/ R  |  | ..... ..... ..... ..... ..... | .....                                     |     |     |
| CP058515.1 Mycoplasma bovis/ V  |  | ..... ..... ..... ..... ..... | .....                                     |     |     |
| CP058487.1 Mycoplasma bovis/ M  |  | ..... ..... ..... ..... ..... | .....                                     |     |     |
| CP058464.1 Mycoplasma bovis/ T  |  | ..... ..... ..... ..... ..... | .....                                     |     |     |
| CP058431.1 Mycoplasma bovis/ A  |  | ..... ..... ..... ..... ..... | .....                                     |     |     |
| CP058416.1 Mycoplasma bovis/ M  |  | ..... ..... ..... ..... ..... | .....                                     |     |     |
| NC_014760.1 Mycoplasma bovis/ P |  | ..... ..... ..... ..... ..... | .....                                     |     |     |
|                                 |  | 90                            | 100                                       | 110 | 120 |
| E. coli K12 gyrA                |  | ..... ..... ..... ..... ..... | SELGITSGTQRRKSARIVGDLGKYHPHGDSSVYEAMVRM   |     |     |
| OM326888.1 Mycoplasma bovis/ M  |  | ..... ..... ..... ..... ..... | .....                                     |     |     |
| CP042939.1 Mycoplasma bovis/ N  |  | ..... ..... ..... ..... ..... | .....                                     |     |     |
| CP042938.1 Mycoplasma bovis/ M  |  | ..... ..... ..... ..... ..... | .....                                     |     |     |
| CP045797.1 Mycoplasma bovis/ X  |  | ..... ..... ..... ..... ..... | .....                                     |     |     |
| CP022599.1 Mycoplasma bovis/ N  |  | ..... ..... ..... ..... ..... | .....                                     |     |     |
| CP022588.1 Mycoplasma bovis/ M  |  | ..... ..... ..... ..... ..... | .....                                     |     |     |
| KR493100.1 Mycoplasma bovis/ M  |  | ..... ..... ..... ..... ..... | .....                                     |     |     |
| CP007591.1 Mycoplasma bovis/ H  |  | ..... ..... ..... ..... ..... | .....                                     |     |     |
| CP005933.1 Mycoplasma bovis/ C  |  | ..... ..... ..... ..... ..... | .....                                     |     |     |
| CP077758.1 Mycoplasma bovis/ R  |  | ..... ..... ..... ..... ..... | .....                                     |     |     |
| CP058515.1 Mycoplasma bovis/ V  |  | ..... ..... ..... ..... ..... | .....                                     |     |     |
| CP058487.1 Mycoplasma bovis/ M  |  | ..... ..... ..... ..... ..... | .....                                     |     |     |
| CP058464.1 Mycoplasma bovis/ T  |  | ..... ..... ..... ..... ..... | .....                                     |     |     |
| CP058431.1 Mycoplasma bovis/ A  |  | ..... ..... ..... ..... ..... | .....                                     |     |     |
| CP058416.1 Mycoplasma bovis/ M  |  | ..... ..... ..... ..... ..... | .....                                     |     |     |
| NC_014760.1 Mycoplasma bovis/ P |  | ..... ..... ..... ..... ..... | .....                                     |     |     |
|                                 |  | 130                           | 140                                       | 150 | 160 |
| E. coli K12 gyrA                |  | ..... ..... ..... ..... ..... | AQOFSMRYPLIDCHGNFGSIDGDAQAAAMRYTEARMSKVAT |     |     |
| OM326888.1 Mycoplasma bovis/ M  |  | ..... ..... ..... ..... ..... | .....                                     |     |     |
| CP042939.1 Mycoplasma bovis/ N  |  | ..... ..... ..... ..... ..... | .....                                     |     |     |
| CP042938.1 Mycoplasma bovis/ M  |  | ..... ..... ..... ..... ..... | .....                                     |     |     |
| CP045797.1 Mycoplasma bovis/ X  |  | ..... ..... ..... ..... ..... | .....                                     |     |     |
| CP022599.1 Mycoplasma bovis/ N  |  | ..... ..... ..... ..... ..... | .....                                     |     |     |
| CP022588.1 Mycoplasma bovis/ M  |  | ..... ..... ..... ..... ..... | .....                                     |     |     |
| KR493100.1 Mycoplasma bovis/ M  |  | ..... ..... ..... ..... ..... | .....                                     |     |     |
| CP007591.1 Mycoplasma bovis/ H  |  | ..... ..... ..... ..... ..... | .....                                     |     |     |
| CP005933.1 Mycoplasma bovis/ C  |  | ..... ..... ..... ..... ..... | .....                                     |     |     |
| CP077758.1 Mycoplasma bovis/ R  |  | ..... ..... ..... ..... ..... | .....                                     |     |     |
| CP058515.1 Mycoplasma bovis/ V  |  | ..... ..... ..... ..... ..... | .....                                     |     |     |
| CP058487.1 Mycoplasma bovis/ M  |  | ..... ..... ..... ..... ..... | .....                                     |     |     |
| CP058464.1 Mycoplasma bovis/ T  |  | ..... ..... ..... ..... ..... | .....                                     |     |     |
| CP058431.1 Mycoplasma bovis/ A  |  | ..... ..... ..... ..... ..... | .....                                     |     |     |
| CP058416.1 Mycoplasma bovis/ M  |  | ..... ..... ..... ..... ..... | .....                                     |     |     |
| NC_014760.1 Mycoplasma bovis/ P |  | ..... ..... ..... ..... ..... | .....                                     |     |     |

Supplementary Figure S2. Amino acid sequence alignments of the *gyrA* gene of the examined *M. bovis* isolate. The sequences are indicated by their accession numbers.

| Seq>                                                   |      | E. coli K12 <i>gyrA</i> | OM326888.1 <i>Mycoplasma bovis</i> /MB.CT. <i>gyrA</i> | CP042939.1 <i>Mycoplasma bovis</i> /NADC59 | CP042938.1 <i>Mycoplasma bovis</i> /MJ1 | CP045797.1 <i>Mycoplasma bovis</i> /XBY01 | CP022599.1 <i>Mycoplasma bovis</i> /NADC61 | CP022588.1 <i>Mycoplasma bovis</i> /MJ4 | KR493100.1 <i>Mycoplasma bovis</i> /MYC22 | CP007591.1 <i>Mycoplasma bovis</i> /HB0501-P180 | CP005933.1 <i>Mycoplasma bovis</i> /CQ-W70 | CP077758.1 <i>Mycoplasma bovis</i> /RM16 | CP058515.1 <i>Mycoplasma bovis</i> /VK9 | CP058487.1 <i>Mycoplasma bovis</i> /Mb276 | CP058464.1 <i>Mycoplasma bovis</i> /TO VK | CP058431.1 <i>Mycoplasma bovis</i> /AR3 | CP058416.1 <i>Mycoplasma bovis</i> /Mb200 | NC_014760.1 <i>Mycoplasma bovis</i> /PG45 |
|--------------------------------------------------------|------|-------------------------|--------------------------------------------------------|--------------------------------------------|-----------------------------------------|-------------------------------------------|--------------------------------------------|-----------------------------------------|-------------------------------------------|-------------------------------------------------|--------------------------------------------|------------------------------------------|-----------------------------------------|-------------------------------------------|-------------------------------------------|-----------------------------------------|-------------------------------------------|-------------------------------------------|
| E. coli K12 <i>gyrA</i>                                | ID   | 100%                    | 100%                                                   | 100%                                       | 100%                                    | 100%                                      | 100%                                       | 100%                                    | 100%                                      | 100%                                            | 100%                                       | 100%                                     | 100%                                    | 100%                                      | 100%                                      | 100%                                    | 100%                                      | 100%                                      |
| OM326888.1 <i>Mycoplasma bovis</i> /MB.CT. <i>gyrA</i> | 100% | ID                      | 100%                                                   | 100%                                       | 100%                                    | 100%                                      | 100%                                       | 100%                                    | 100%                                      | 100%                                            | 100%                                       | 100%                                     | 100%                                    | 100%                                      | 100%                                      | 100%                                    | 100%                                      | 100%                                      |
| CP042939.1 <i>Mycoplasma bovis</i> /NADC59             | 100% | 100%                    | ID                                                     | 100%                                       | 100%                                    | 100%                                      | 100%                                       | 100%                                    | 100%                                      | 100%                                            | 100%                                       | 100%                                     | 100%                                    | 100%                                      | 100%                                      | 100%                                    | 100%                                      | 100%                                      |
| CP042938.1 <i>Mycoplasma bovis</i> /MJ1                | 100% | 100%                    | 100%                                                   | ID                                         | 100%                                    | 100%                                      | 100%                                       | 100%                                    | 100%                                      | 100%                                            | 100%                                       | 100%                                     | 100%                                    | 100%                                      | 100%                                      | 100%                                    | 100%                                      | 100%                                      |
| CP045797.1 <i>Mycoplasma bovis</i> /XBY01              | 100% | 100%                    | 100%                                                   | 100%                                       | ID                                      | 100%                                      | 100%                                       | 100%                                    | 100%                                      | 100%                                            | 100%                                       | 100%                                     | 100%                                    | 100%                                      | 100%                                      | 100%                                    | 100%                                      | 100%                                      |
| CP022599.1 <i>Mycoplasma bovis</i> /NADC61             | 100% | 100%                    | 100%                                                   | 100%                                       | 100%                                    | ID                                        | 100%                                       | 100%                                    | 100%                                      | 100%                                            | 100%                                       | 100%                                     | 100%                                    | 100%                                      | 100%                                      | 100%                                    | 100%                                      | 100%                                      |
| CP022588.1 <i>Mycoplasma bovis</i> /MJ4                | 100% | 100%                    | 100%                                                   | 100%                                       | 100%                                    | 100%                                      | ID                                         | 100%                                    | 100%                                      | 100%                                            | 100%                                       | 100%                                     | 100%                                    | 100%                                      | 100%                                      | 100%                                    | 100%                                      | 100%                                      |
| KR493100.1 <i>Mycoplasma bovis</i> /MYC22              | 100% | 100%                    | 100%                                                   | 100%                                       | 100%                                    | 100%                                      | 100%                                       | ID                                      | 100%                                      | 100%                                            | 100%                                       | 100%                                     | 100%                                    | 100%                                      | 100%                                      | 100%                                    | 100%                                      | 100%                                      |
| CP007591.1 <i>Mycoplasma bovis</i> /HB0501-P180        | 100% | 100%                    | 100%                                                   | 100%                                       | 100%                                    | 100%                                      | 100%                                       | 100%                                    | ID                                        | 100%                                            | 100%                                       | 100%                                     | 100%                                    | 100%                                      | 100%                                      | 100%                                    | 100%                                      | 100%                                      |
| CP005933.1 <i>Mycoplasma bovis</i> /CQ-W70             | 100% | 100%                    | 100%                                                   | 100%                                       | 100%                                    | 100%                                      | 100%                                       | 100%                                    | 100%                                      | ID                                              | 100%                                       | 100%                                     | 100%                                    | 100%                                      | 100%                                      | 100%                                    | 100%                                      | 100%                                      |
| CP077758.1 <i>Mycoplasma bovis</i> /RM16               | 100% | 100%                    | 100%                                                   | 100%                                       | 100%                                    | 100%                                      | 100%                                       | 100%                                    | 100%                                      | 100%                                            | ID                                         | 100%                                     | 100%                                    | 100%                                      | 100%                                      | 100%                                    | 100%                                      | 100%                                      |
| CP058515.1 <i>Mycoplasma bovis</i> /VK9                | 100% | 100%                    | 100%                                                   | 100%                                       | 100%                                    | 100%                                      | 100%                                       | 100%                                    | 100%                                      | 100%                                            | 100%                                       | ID                                       | 100%                                    | 100%                                      | 100%                                      | 100%                                    | 100%                                      | 100%                                      |
| CP058487.1 <i>Mycoplasma bovis</i> /Mb276              | 100% | 100%                    | 100%                                                   | 100%                                       | 100%                                    | 100%                                      | 100%                                       | 100%                                    | 100%                                      | 100%                                            | 100%                                       | 100%                                     | ID                                      | 100%                                      | 100%                                      | 100%                                    | 100%                                      | 100%                                      |
| CP058464.1 <i>Mycoplasma bovis</i> /TO VK              | 100% | 100%                    | 100%                                                   | 100%                                       | 100%                                    | 100%                                      | 100%                                       | 100%                                    | 100%                                      | 100%                                            | 100%                                       | 100%                                     | 100%                                    | ID                                        | 100%                                      | 100%                                    | 100%                                      | 100%                                      |
| CP058431.1 <i>Mycoplasma bovis</i> /AR3                | 100% | 100%                    | 100%                                                   | 100%                                       | 100%                                    | 100%                                      | 100%                                       | 100%                                    | 100%                                      | 100%                                            | 100%                                       | 100%                                     | 100%                                    | 100%                                      | ID                                        | 100%                                    | 100%                                      | 100%                                      |
| CP058416.1 <i>Mycoplasma bovis</i> /Mb200              | 100% | 100%                    | 100%                                                   | 100%                                       | 100%                                    | 100%                                      | 100%                                       | 100%                                    | 100%                                      | 100%                                            | 100%                                       | 100%                                     | 100%                                    | 100%                                      | 100%                                      | ID                                      | 100%                                      | 100%                                      |
| NC_014760.1 <i>Mycoplasma bovis</i> /PG45              | 100% | 100%                    | 100%                                                   | 100%                                       | 100%                                    | 100%                                      | 100%                                       | 100%                                    | 100%                                      | 100%                                            | 100%                                       | 100%                                     | 100%                                    | 100%                                      | 100%                                      | 100%                                    | ID                                        | 100%                                      |

**Supplementary Figure S3.** Amino acid identity percentages between the *gyrA* genes of *E. coli* K12, *M. bovis gyrA* (OM326888), *M. bovis* PG45 (control negative; enrofloxacin sensitive), and other *M. bovis* isolates on GenBank. ID: identity.

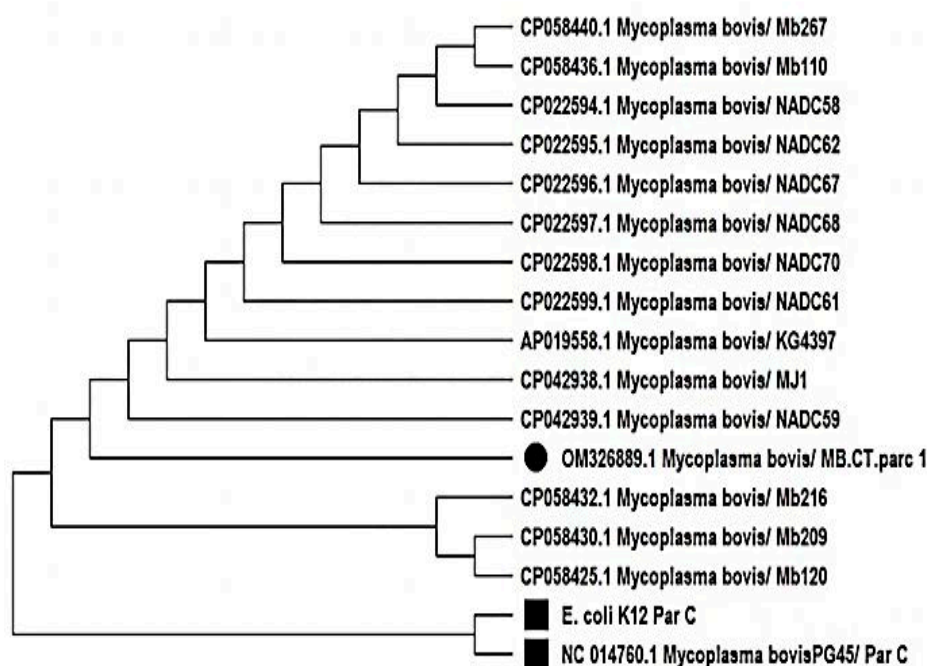

**Supplementary Figure S4.** Phylogenetic tree of the examined *M. bovis* isolate based on the *parC* sequence. • Our examined *M. bovis* isolate, ■ Reference strains; *E. coli* K12 and *M. bovis* PG45 (control negative; enrofloxacin sensitive).

|                                       |                                                                    |
|---------------------------------------|--------------------------------------------------------------------|
| <b>E. coli K12 Par C</b>              | VQENLDTVVADRF SRY SKYV IQQALPDVRDGLKPVQRRI LYSMYD LG LQH NKPFKKSAR |
| <b>NC_014760.1 Mycoplasma bovisPG</b> | .....                                                              |
| OM326889.1 Mycoplasma bovis/ M        | .R.....                                                            |
| CP042939.1 Mycoplasma bovis/ N        | .R.....                                                            |
| CP042938.1 Mycoplasma bovis/ M        | .R.....                                                            |
| AP019558.1 Mycoplasma bovis/ K        | .R.....                                                            |
| CP022599.1 Mycoplasma bovis/ N        | .R.....                                                            |
| CP022598.1 Mycoplasma bovis/ N        | .R.....                                                            |
| CP022597.1 Mycoplasma bovis/ N        | .R.....                                                            |
| CP022596.1 Mycoplasma bovis/ N        | .R.....                                                            |
| CP022595.1 Mycoplasma bovis/ N        | .R.....                                                            |
| CP022594.1 Mycoplasma bovis/ N        | .R.....                                                            |
| CP058440.1 Mycoplasma bovis/ M        | .R.....                                                            |
| CP058436.1 Mycoplasma bovis/ M        | .R.....                                                            |
| CP058432.1 Mycoplasma bovis/ M        | .R.....                                                            |
| CP058430.1 Mycoplasma bovis/ M        | .R.....                                                            |
| CP058425.1 Mycoplasma bovis/ M        | .R.....                                                            |
|                                       | 70 80 90 100 110 120                                               |
| <b>E. coli K12 Par C</b>              | VVGDI VICKYHPHCDI SIYNAMVRMCQEWKMGHTLVEMHGNVGSIDDDPAAAMRYTEARLS    |
| <b>NC_014760.1 Mycoplasma bovisPG</b> | .....D.....                                                        |
| OM326889.1 Mycoplasma bovis/ M        | .....S...D.....                                                    |
| CP042939.1 Mycoplasma bovis/ N        | .....S...D.....                                                    |
| CP042938.1 Mycoplasma bovis/ M        | .....S...D.....                                                    |
| AP019558.1 Mycoplasma bovis/ K        | .....S...D.....                                                    |
| CP022599.1 Mycoplasma bovis/ N        | .....S...D.....                                                    |
| CP022598.1 Mycoplasma bovis/ N        | .....S...D.....                                                    |
| CP022597.1 Mycoplasma bovis/ N        | .....S...D.....                                                    |
| CP022596.1 Mycoplasma bovis/ N        | .....S...D.....                                                    |
| CP022595.1 Mycoplasma bovis/ N        | .....S...D.....                                                    |
| CP022594.1 Mycoplasma bovis/ N        | .....S...D.....                                                    |
| CP058440.1 Mycoplasma bovis/ M        | .....S...D.....                                                    |
| CP058436.1 Mycoplasma bovis/ M        | .....S...D.....                                                    |
| CP058432.1 Mycoplasma bovis/ M        | .....S...D.....                                                    |
| CP058430.1 Mycoplasma bovis/ M        | .....S...D.....                                                    |
| CP058425.1 Mycoplasma bovis/ M        | .....S...D.....                                                    |

**Supplementary Figure S5.** Amino acid sequence alignments of the *parC* gene of the examined *M. bovis* isolate. The sequences are indicated by their accession numbers.



| Seq>                                      | E. coli K12 Par C                         |      |      |      |      |      |      |      |      |      |      |      |      |      |      |      |      |      |     |
|-------------------------------------------|-------------------------------------------|------|------|------|------|------|------|------|------|------|------|------|------|------|------|------|------|------|-----|
|                                           | OM326889.1 Mycoplasma bovis/ MB.CT.parc 1 |      |      |      |      |      |      |      |      |      |      |      |      |      |      |      |      |      |     |
|                                           | CP042939.1 Mycoplasma bovis/ NADC59       |      |      |      |      |      |      |      |      |      |      |      |      |      |      |      |      |      |     |
|                                           | CP042938.1 Mycoplasma bovis/ MJ1          |      |      |      |      |      |      |      |      |      |      |      |      |      |      |      |      |      |     |
|                                           | AP019558.1 Mycoplasma bovis/ KG4397       |      |      |      |      |      |      |      |      |      |      |      |      |      |      |      |      |      |     |
|                                           | CP022599.1 Mycoplasma bovis/ NADC61       |      |      |      |      |      |      |      |      |      |      |      |      |      |      |      |      |      |     |
|                                           | CP022598.1 Mycoplasma bovis/ NADC70       |      |      |      |      |      |      |      |      |      |      |      |      |      |      |      |      |      |     |
|                                           | CP022597.1 Mycoplasma bovis/ NADC68       |      |      |      |      |      |      |      |      |      |      |      |      |      |      |      |      |      |     |
|                                           | CP022596.1 Mycoplasma bovis/ NADC67       |      |      |      |      |      |      |      |      |      |      |      |      |      |      |      |      |      |     |
|                                           | CP022595.1 Mycoplasma bovis/ NADC62       |      |      |      |      |      |      |      |      |      |      |      |      |      |      |      |      |      |     |
|                                           | CP022594.1 Mycoplasma bovis/ NADC59       |      |      |      |      |      |      |      |      |      |      |      |      |      |      |      |      |      |     |
|                                           | CP058440.1 Mycoplasma bovis/ Mb267        |      |      |      |      |      |      |      |      |      |      |      |      |      |      |      |      |      |     |
|                                           | CP058436.1 Mycoplasma bovis/ Mb110        |      |      |      |      |      |      |      |      |      |      |      |      |      |      |      |      |      |     |
|                                           | CP058432.1 Mycoplasma bovis/ Mb216        |      |      |      |      |      |      |      |      |      |      |      |      |      |      |      |      |      |     |
|                                           | CP058430.1 Mycoplasma bovis/ Mb209        |      |      |      |      |      |      |      |      |      |      |      |      |      |      |      |      |      |     |
|                                           | CP058425.1 Mycoplasma bovis/ Mb120        |      |      |      |      |      |      |      |      |      |      |      |      |      |      |      |      |      |     |
|                                           | NC_014760.1 Mycoplasma bovis/PG45/ Par C  |      |      |      |      |      |      |      |      |      |      |      |      |      |      |      |      |      |     |
| E. coli K12 Par C                         | ID                                        | 98%  | 98%  | 98%  | 98%  | 98%  | 98%  | 98%  | 98%  | 98%  | 98%  | 98%  | 98%  | 98%  | 98%  | 98%  | 98%  | 98%  | 98% |
| OM326889.1 Mycoplasma bovis/ MB.CT.parc 1 | 98%                                       | ID   | 100% | 100% | 100% | 100% | 100% | 100% | 100% | 100% | 100% | 100% | 100% | 100% | 100% | 100% | 100% | 100% | 99% |
| CP042939.1 Mycoplasma bovis/ NADC59       | 98%                                       | 100% | ID   | 100% | 100% | 100% | 100% | 100% | 100% | 100% | 100% | 100% | 100% | 100% | 100% | 100% | 100% | 100% | 99% |
| CP042938.1 Mycoplasma bovis/ MJ1          | 98%                                       | 100% | 100% | ID   | 100% | 100% | 100% | 100% | 100% | 100% | 100% | 100% | 100% | 100% | 100% | 100% | 100% | 100% | 99% |
| AP019558.1 Mycoplasma bovis/ KG4397       | 98%                                       | 100% | 100% | 100% | ID   | 100% | 100% | 100% | 100% | 100% | 100% | 100% | 100% | 100% | 100% | 100% | 100% | 100% | 99% |
| CP022599.1 Mycoplasma bovis/ NADC61       | 98%                                       | 100% | 100% | 100% | 100% | ID   | 100% | 100% | 100% | 100% | 100% | 100% | 100% | 100% | 100% | 100% | 100% | 100% | 99% |
| CP022598.1 Mycoplasma bovis/ NADC70       | 98%                                       | 100% | 100% | 100% | 100% | 100% | ID   | 100% | 100% | 100% | 100% | 100% | 100% | 100% | 100% | 100% | 100% | 100% | 99% |
| CP022597.1 Mycoplasma bovis/ NADC68       | 98%                                       | 100% | 100% | 100% | 100% | 100% | 100% | ID   | 100% | 100% | 100% | 100% | 100% | 100% | 100% | 100% | 100% | 100% | 99% |
| CP022596.1 Mycoplasma bovis/ NADC67       | 98%                                       | 100% | 100% | 100% | 100% | 100% | 100% | 100% | ID   | 100% | 100% | 100% | 100% | 100% | 100% | 100% | 100% | 100% | 99% |
| CP022595.1 Mycoplasma bovis/ NADC62       | 98%                                       | 100% | 100% | 100% | 100% | 100% | 100% | 100% | 100% | ID   | 100% | 100% | 100% | 100% | 100% | 100% | 100% | 100% | 99% |
| CP022594.1 Mycoplasma bovis/ NADC59       | 98%                                       | 100% | 100% | 100% | 100% | 100% | 100% | 100% | 100% | 100% | ID   | 100% | 100% | 100% | 100% | 100% | 100% | 100% | 99% |
| CP058440.1 Mycoplasma bovis/ Mb267        | 98%                                       | 100% | 100% | 100% | 100% | 100% | 100% | 100% | 100% | 100% | 100% | ID   | 100% | 100% | 100% | 100% | 100% | 100% | 99% |
| CP058436.1 Mycoplasma bovis/ Mb110        | 98%                                       | 100% | 100% | 100% | 100% | 100% | 100% | 100% | 100% | 100% | 100% | 100% | ID   | 100% | 100% | 100% | 100% | 100% | 99% |
| CP058432.1 Mycoplasma bovis/ Mb216        | 98%                                       | 100% | 100% | 100% | 100% | 100% | 100% | 100% | 100% | 100% | 100% | 100% | 100% | ID   | 100% | 100% | 100% | 100% | 99% |
| CP058430.1 Mycoplasma bovis/ Mb209        | 98%                                       | 100% | 100% | 100% | 100% | 100% | 100% | 100% | 100% | 100% | 100% | 100% | 100% | 100% | 100% | ID   | 100% | 100% | 99% |
| CP058425.1 Mycoplasma bovis/ Mb120        | 98%                                       | 100% | 100% | 100% | 100% | 100% | 100% | 100% | 100% | 100% | 100% | 100% | 100% | 100% | 100% | 100% | ID   | 100% | 99% |
| NC_014760.1 Mycoplasma bovis/PG45/ Par C  | 99%                                       | 99%  | 99%  | 99%  | 99%  | 99%  | 99%  | 99%  | 99%  | 99%  | 99%  | 99%  | 99%  | 99%  | 99%  | 99%  | 99%  | 99%  | ID  |

**Supplementary Figure S6.** Amino acid identity percentages between the *ParC* genes of *E. coli* K12, *M. bovis* *ParC* (OM326889), *M. bovis* PG45 (control negative; enrofloxacin sensitive), and other *M. bovis* isolates on Genebank. ID: identity.
